# Supplementary material for: Variant effect predictors: a systematic review and practical guide
Source: PubMed Central journal article supplement (PMC11098935; doi:10.1007/s00439-024-02670-5), 2024-04-04

Number of variant types supported for the first time

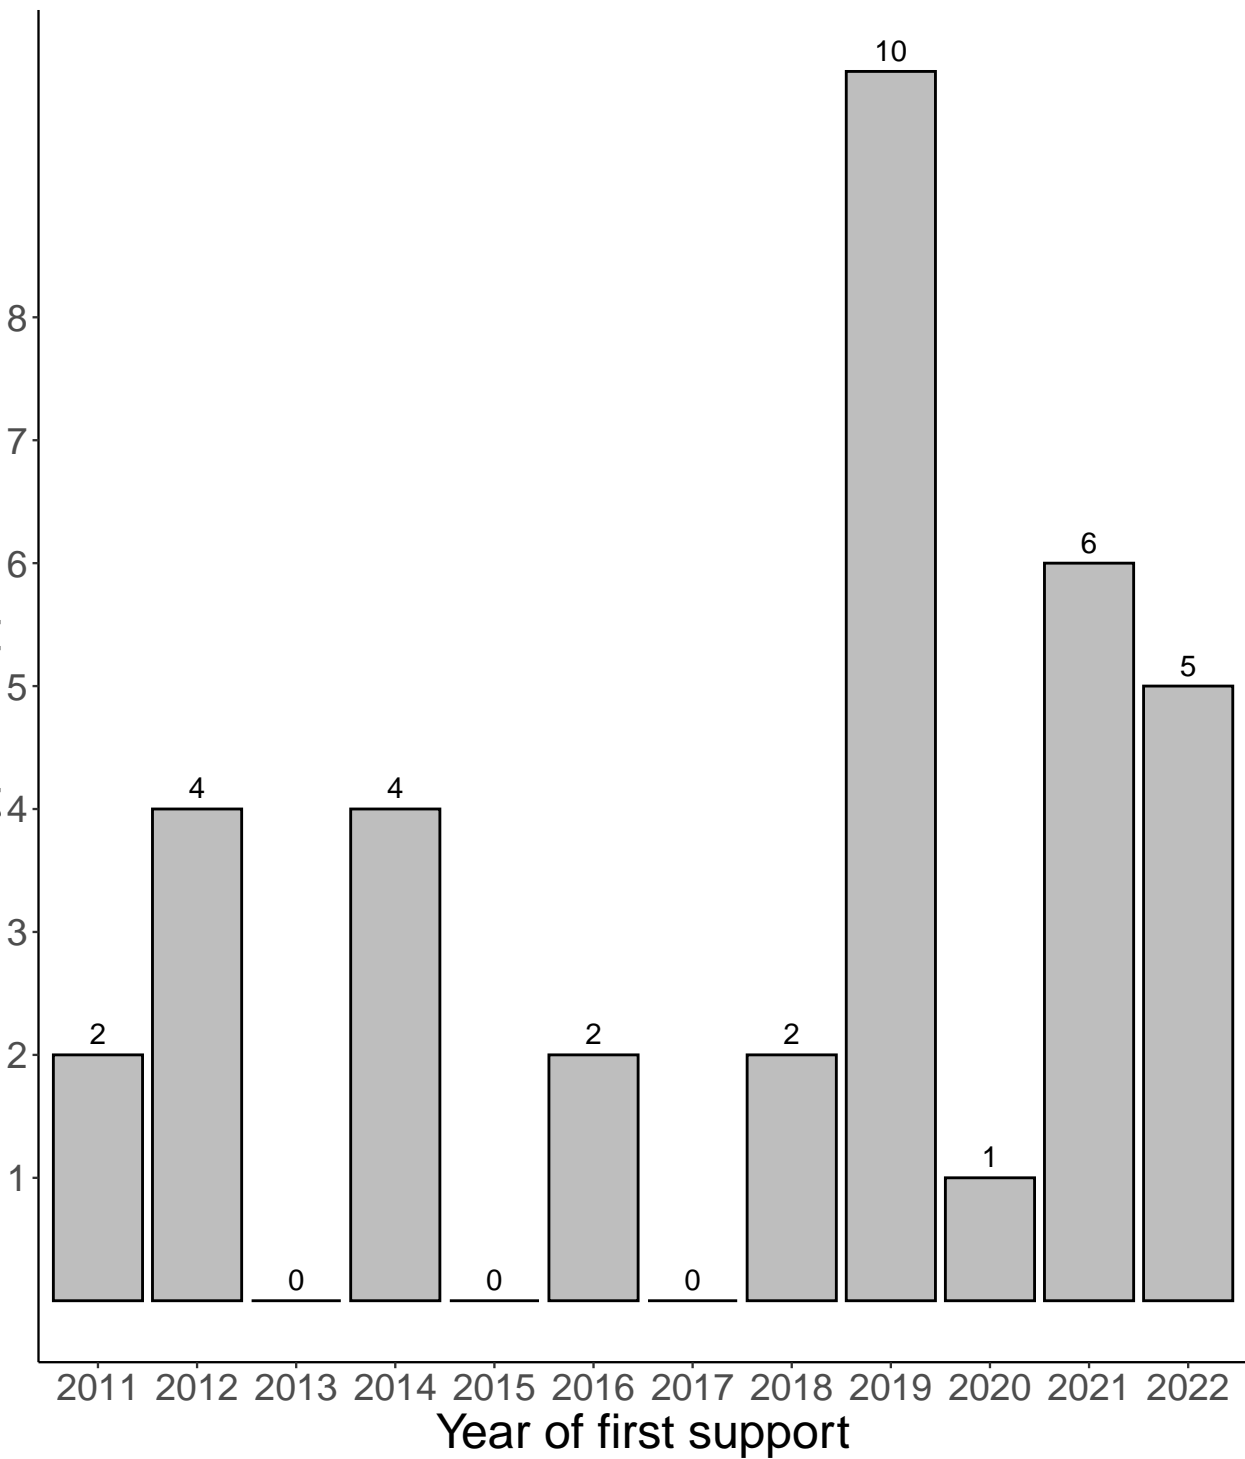

Supplement: 439_2024_2670_MOESM1_ESM.pdf [file 439_2024_2670_MOESM1_ESM.pdf]
